# Supplementary material
Source: HighWire-hosted journal article supplement (https://jitc.bmj.com/content/10/3/e004043)
Supplement: inline-supplementary-material-2 [file inline-supplementary-material-2.pdf]

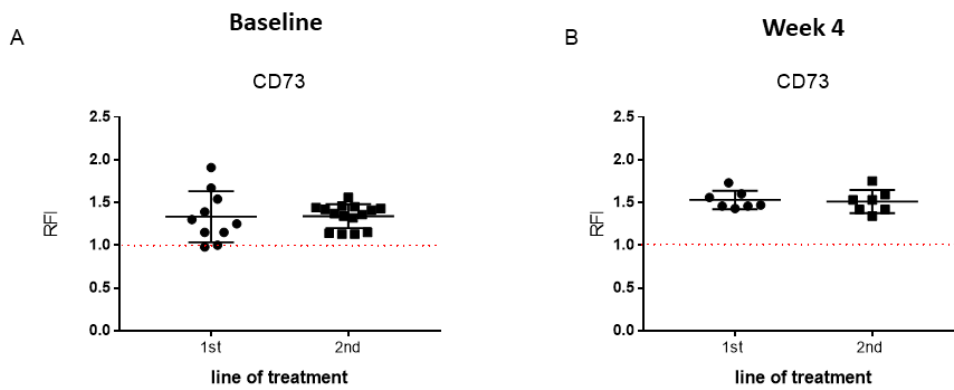

**Online Supplemental Figure 2.** A) Expression levels of exosomal CD73 as RFI values at baseline in patients treated in first line (n=10) or in second line (n=15) with anti-PD-1 blocking antibody monotherapy. B) Expression levels of exosomal CD73 as RFI values at week 4 in patients treated in first line (n=7) or in second line (n=7) with anti-PD-1 blocking antibody monotherapy.
